# Supplementary material for: Irisin exhibits neuroprotection by preventing mitochondrial damage in Parkinson’s disease
Source: Springer Nature journal article supplement (doi:10.1038/s41531-023-00453-9), 2023-01-31

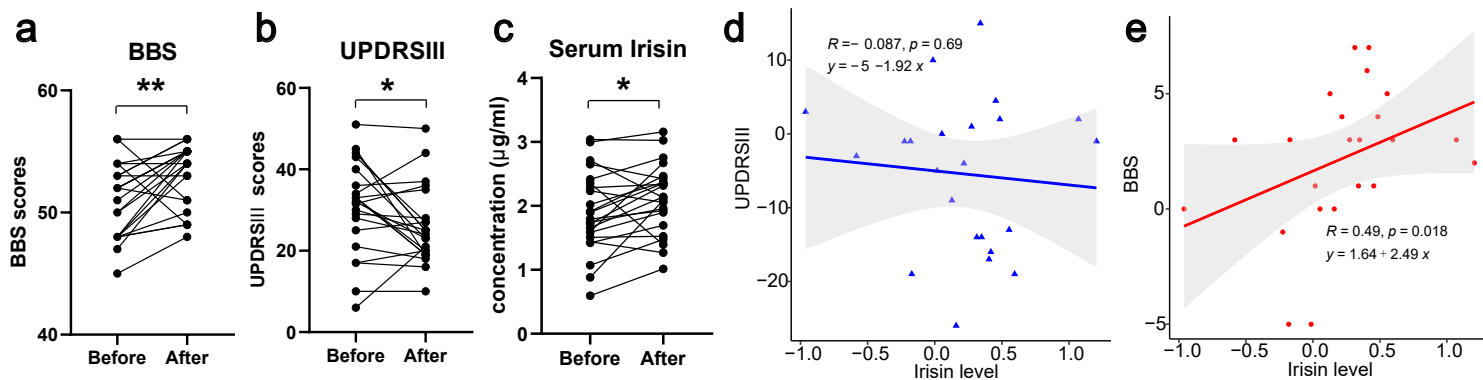

## Supplementary Figure 1

The relationship between motor function of PD patients and their serum irisin concentration.

(abc) After 12 weeks of regular exercise, balance function scored by BBS (a), motor function evaluated by UPDRSIII (b) of PD patients were improved, and serum irisin concentration (c) of PD patients were increased.

(d) The correlation between increased serum irisin concentration and improved motor function scored by UPDRSIII. (e) The correlation between increased serum irisin concentration and improved balance function scored by BBS. p values are determined by paired t-test and Pearson correlation coefficient. \* $p < 0.05$ , \*\* $p < 0.01$ , and \*\*\* $p < 0.001$  vs PD patients before 12-week regular exercise.

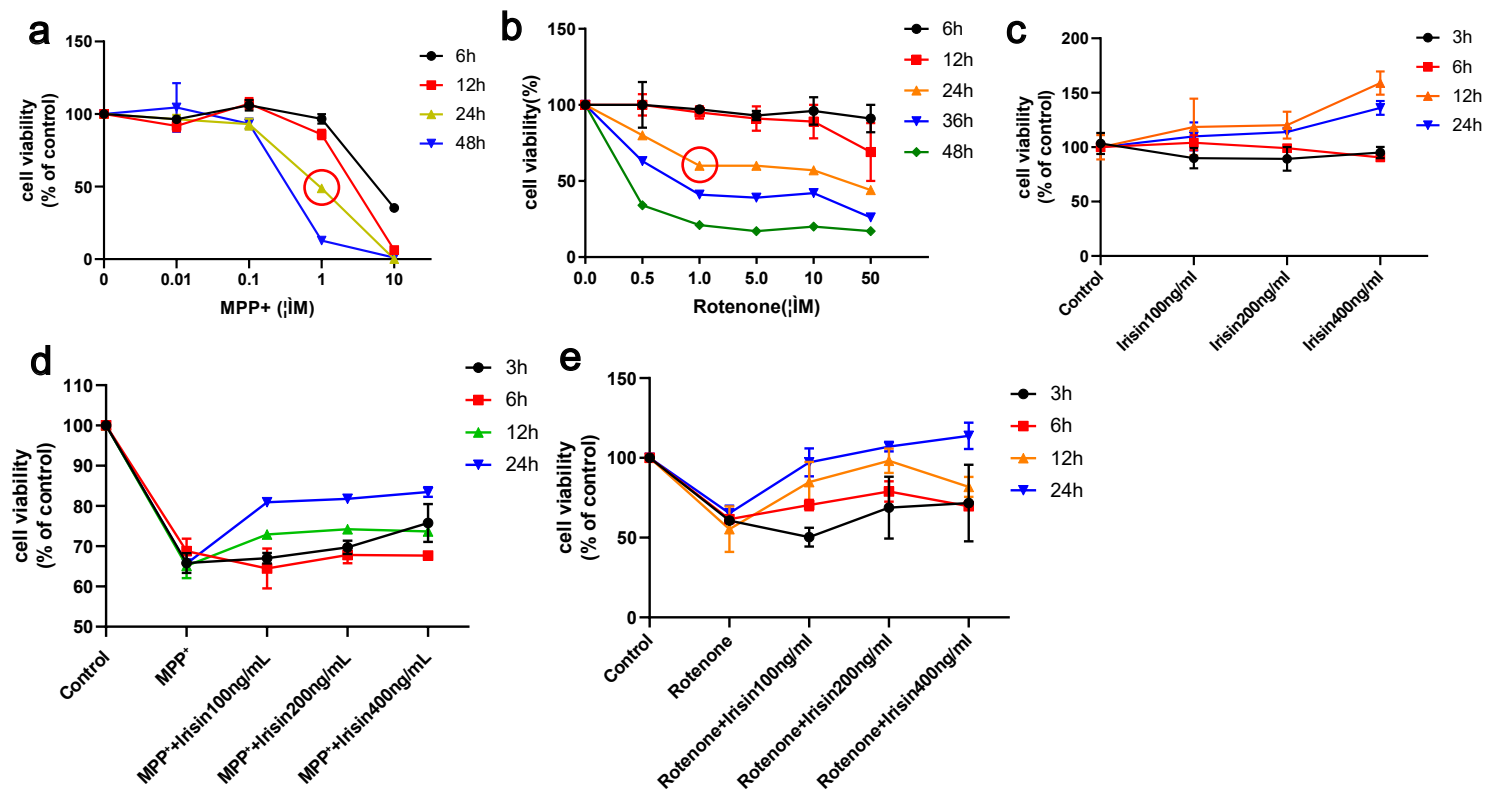

## Supplementary Figure 2

### The optimal dose of rotenone, irisin, MPP+ in SH-SY5Y cells.

SH-SY5Y cells were seeded and incubated until 80% cell density. (**abcde**) The cells were treated with indicated time and indicated concentration of rotenone, irisin, MPP+ for draw the time and dose dependent curve of MPP+ (**a**), rotenone (**b**), irisin (**c**), irisin and MPP+ co-treatment (**d**), and irisin and rotenone co-treatment (**e**) in SH-SY5Y cells.

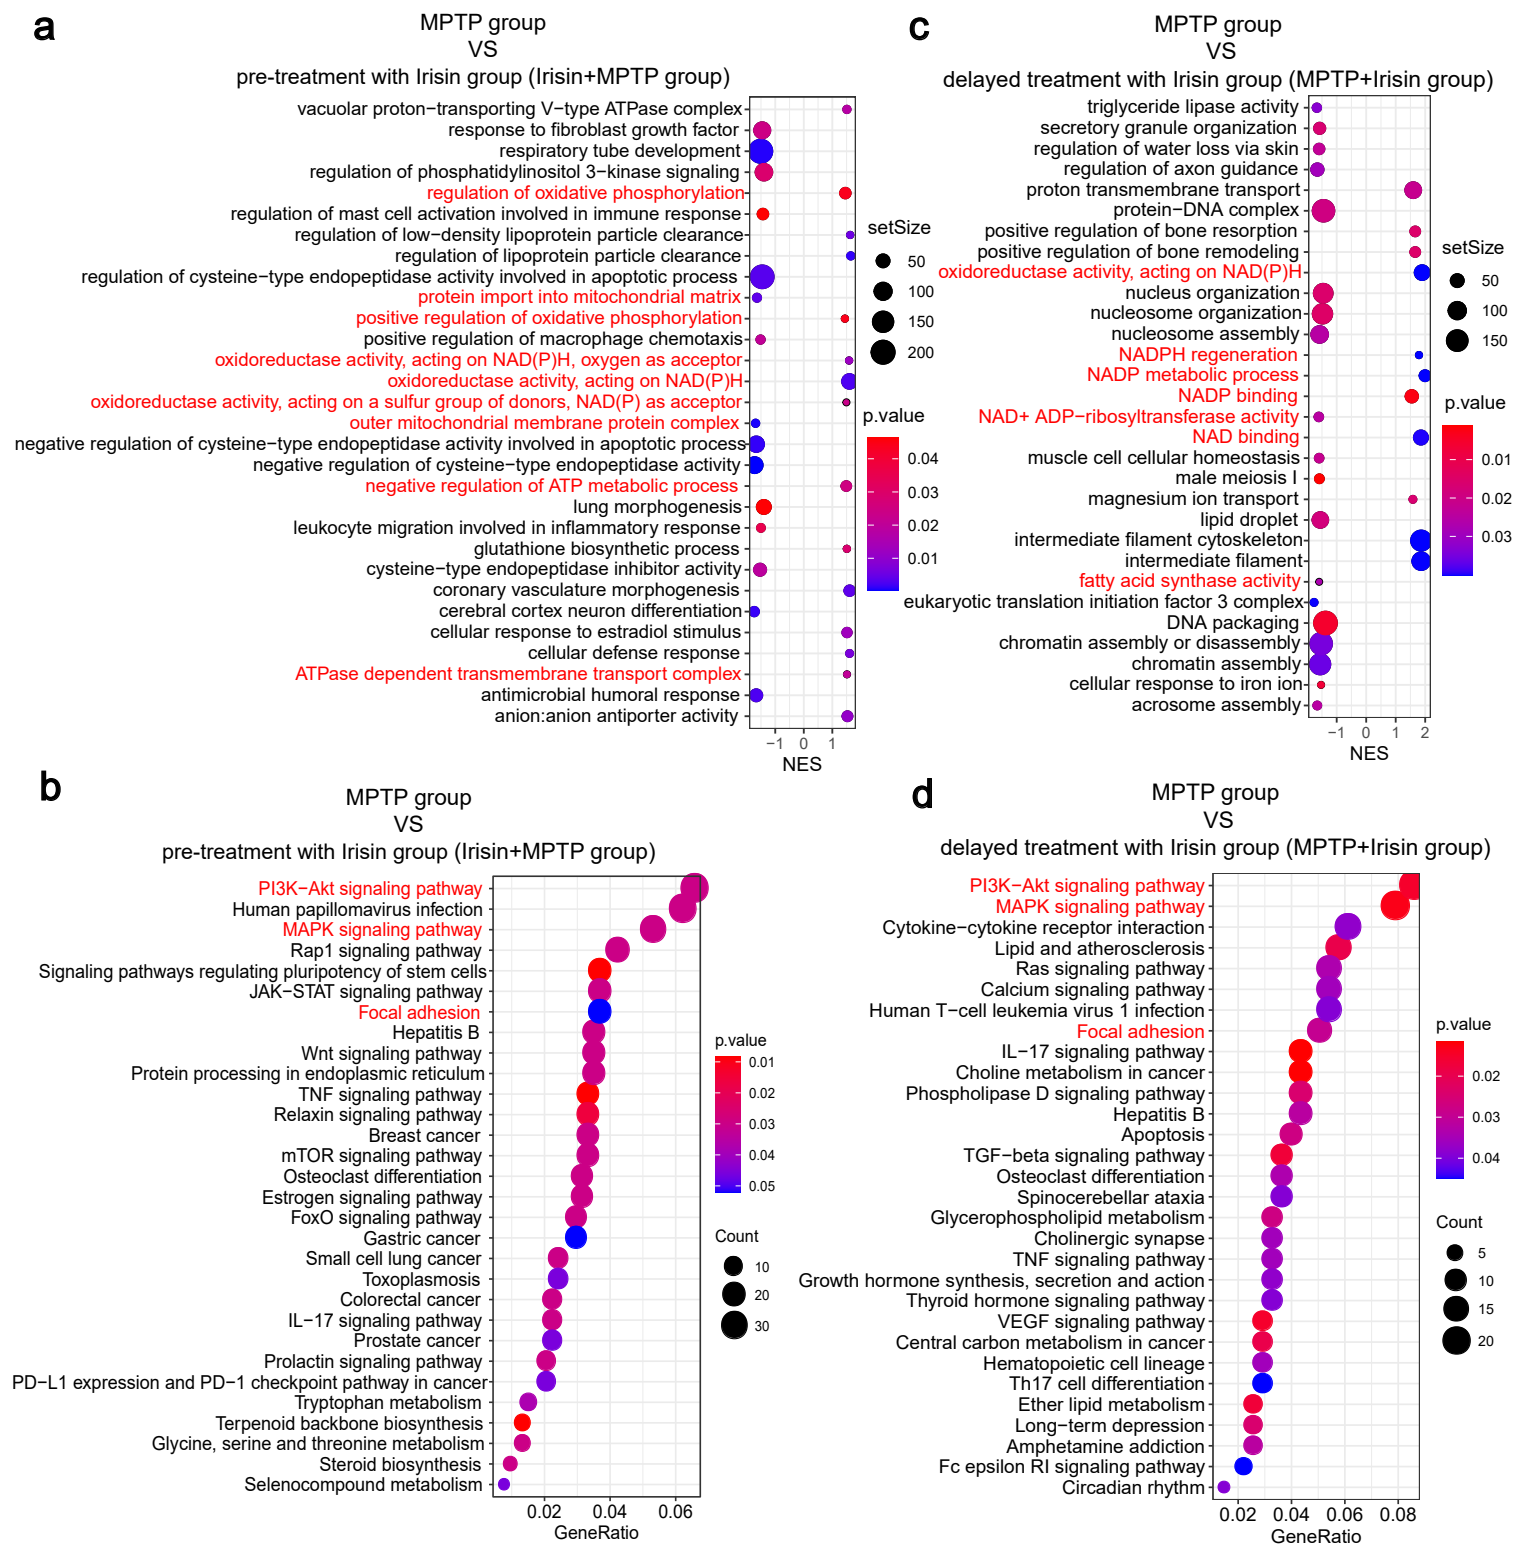

### Supplementary Figure 3

#### The analysis of RNA-Seq in MPTP treated mice.

- (a) GSEA analysis for dysregulated pathways in midbrain in MPTP treated mice receiving pre-treatment with irisin.
- (b) KEGG analysis for dysregulated pathways in midbrain in MPTP treated mice receiving pre-treatment with irisin.
- (c) GSEA analysis for dysregulated pathways in midbrain in MPTP treated mice receiving delayed treatment with irisin.
- (d) KEGG analysis for dysregulated pathways in midbrain in MPTP treated mice receiving delayed treatment with irisin. KEGG, Kyoto Encyclopedia of Genes and Genomes.

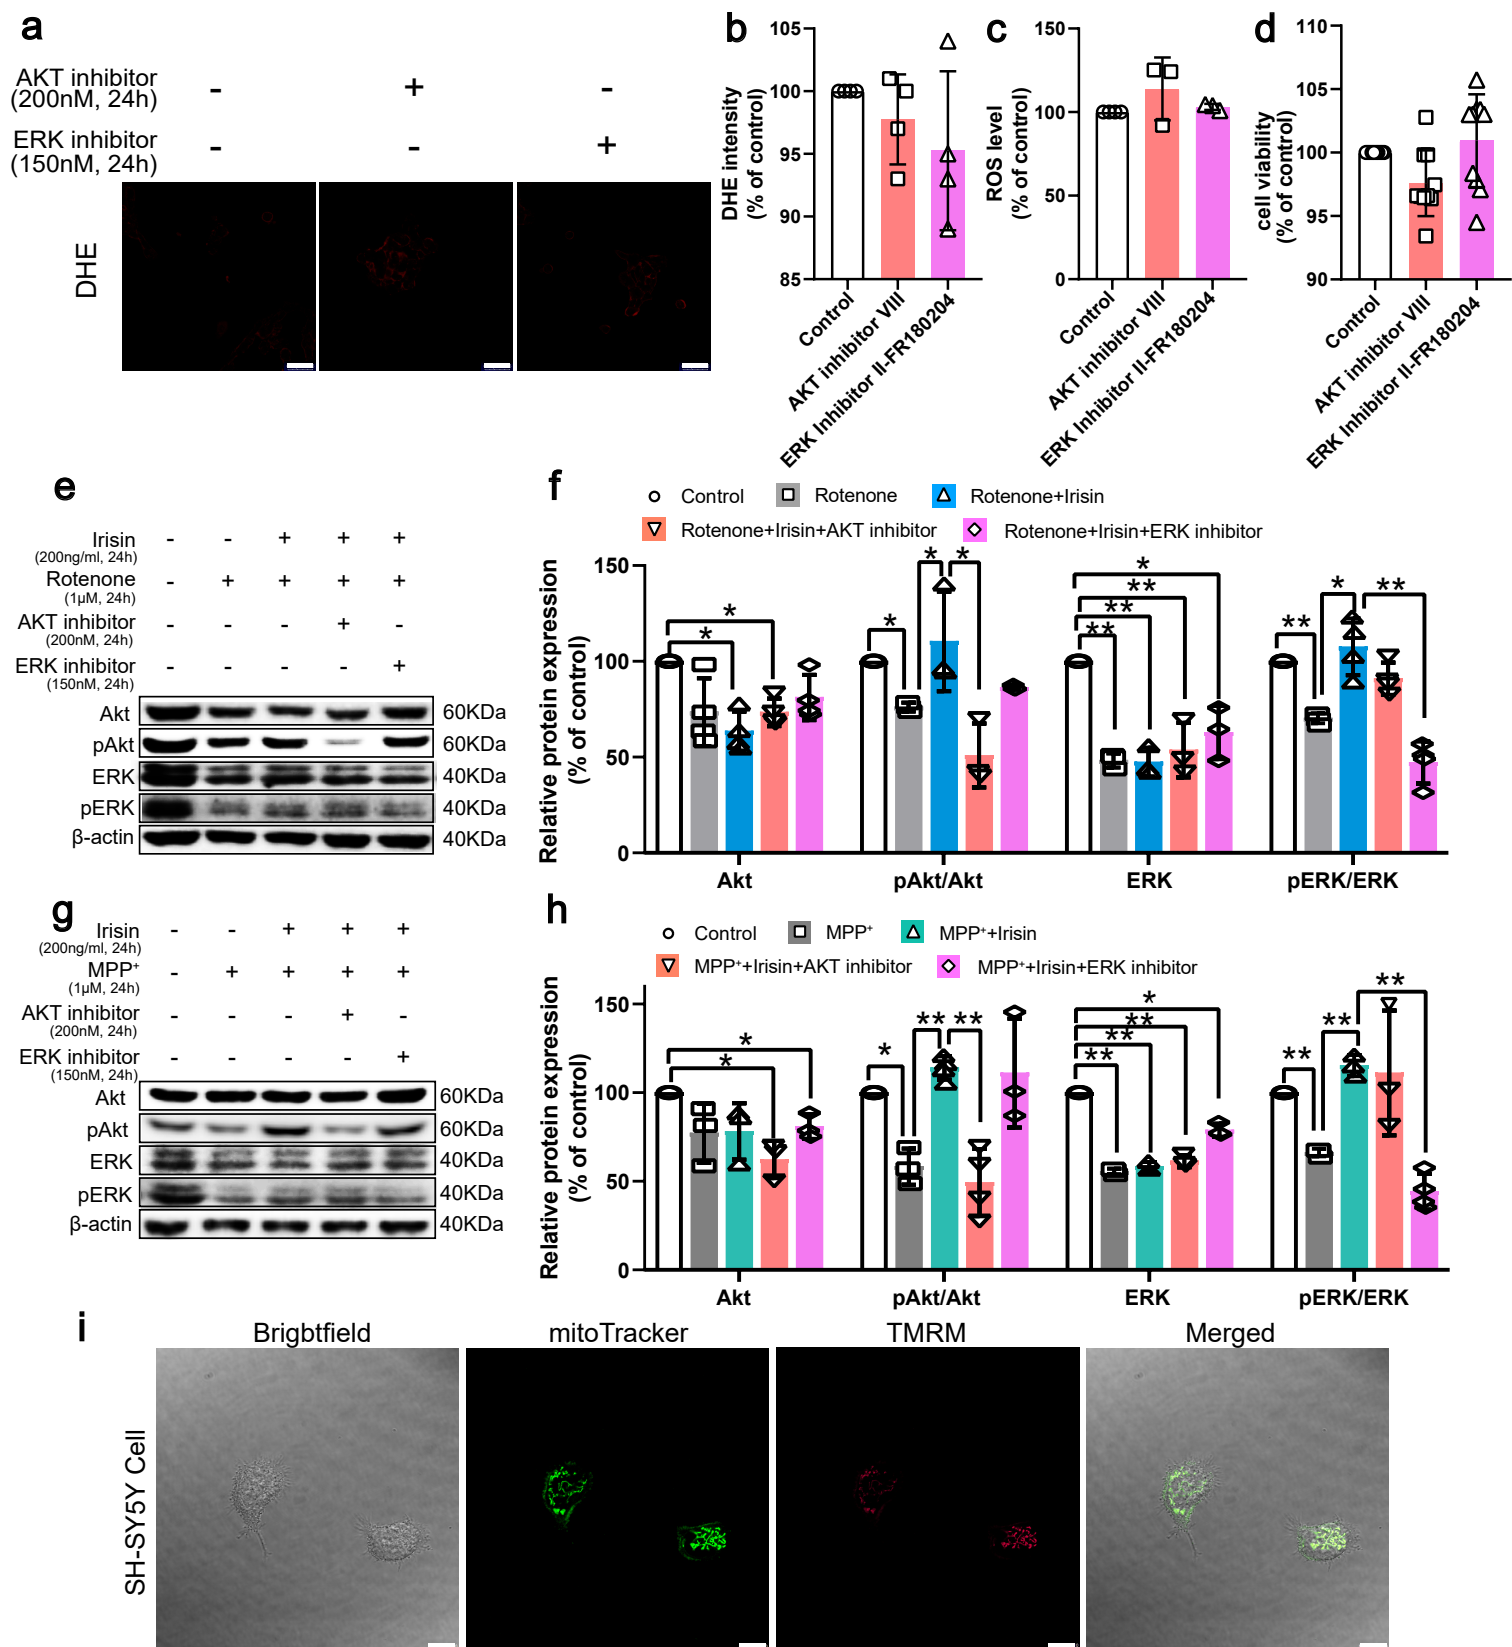

## Supplementary Figure 4

### The optimal dose of Akt inhibitor or ERK1/2 inhibitor.

The cells were treated with Akt inhibitor (200nM) or ERK1/2 inhibitor (150nM) for 24h to test its effect on cell viability (**d**) and ROS level detected by DHE staining (**ab**) and DCFH-DA assay (**c**). Without affecting cell viability, the specified concentration of Akt inhibitor (200nM) or ERK1/2 inhibitor (150nM) can effectively inhibit the corresponding signaling pathway in rotenone-induced (**ef**) or MPP<sup>+</sup>-induced (**gh**) PD models. (**i**) Confocal image of cell coverslips stained by mitoTracker and TMRM showing mitochondrial structure in SH-SY5Y cells. Scale bar, 2 μm. All data are presented as mean ± SEM (n = 3). p values are determined by one-way ANOVA. \*p < 0.05, \*\*p < 0.01, and \*\*\* < 0.001.

**Supplementary Table 1. Antibodies used in immunofluorescence staining and western blot**

| <b>Antibodies</b>                                         | <b>Dilution</b>           | <b>Species</b> | <b>Catalog</b>        | <b>Company</b>                          |
|-----------------------------------------------------------|---------------------------|----------------|-----------------------|-----------------------------------------|
| TH                                                        | 1:200(IF)/1:2500(WB)      | Rabbit         | AB152                 | Millipore                               |
| BDNF                                                      | 1:2500(WB)                | Rabbit         | ab108319              | Abcam                                   |
| NeuroTrace Green<br>Fluorescent Nissl Stains<br>(500/525) | 1:100(IF)                 | -              | N-21480               | ThermoFisher                            |
| Alexa Fluor Plus 555<br>HRP-conjugated anti-<br>mouse IgG | 1:1000(IF)<br>1:10000(WB) | Goat<br>Goat   | A32732<br>115-035-003 | Invitrogen<br>Jackson<br>ImmunoResearch |
| HRP-conjugated anti-<br>rabbit IgG                        | 1:10000(WB)               | Goat           | 111-035-003           | Jackson<br>ImmunoResearch               |
| DRP1                                                      | 1:2500(WB)                | Rabbit         | 8570S                 | CST                                     |
| phospho-DRP1(Ser616)                                      | 1:2500(WB)                | Rabbit         | AP0849                | Abclonal                                |
| phospho-DRP1(Ser637)                                      | 1:2500(WB)                | Rabbit         | AP0812                | Abclonal                                |
| OPA1                                                      | 1:2500(WB)                | Rabbit         | 80471S                | CST                                     |
| MFN2                                                      | 1:2500(WB)                | Rabbit         | 9482S                 | CST                                     |
| UCP2                                                      | 1:2500(WB)                | Rabbit         | 89326S                | CST                                     |
| MFN1                                                      | 1:2500(WB)                | Rabbit         | 14739S                | CST                                     |
| SIRT1                                                     | 1:2500(WB)                | Rabbit         | 9475                  | CST                                     |
| SIRT3                                                     | 1:2500(WB)                | Rabbit         | 5490                  | CST                                     |
| PGC-1 $\alpha$                                            | 1:2500(WB)                | Rabbit         | ab54481               | Abcam                                   |
| TFAM                                                      | 1:2500(WB)                | Rabbit         | ab131607              | Abcam                                   |
| NRF1                                                      | 1:2500(WB)                | Rabbit         | 69432                 | CST                                     |
| NRF2                                                      | 1:2500(WB)                | Rabbit         | 12721S                | CST                                     |
| TOM20                                                     | 1:2500(WB)                | Rabbit         | A19403                | Abclonal                                |
| CASPASE3                                                  | 1:2500(WB)                | Rabbit         | 9662S                 | CST                                     |
| cleaved-CASPASE3                                          | 1:2500(WB)                | Rabbit         | 9661                  | CST                                     |
| BAX                                                       | 1:2500(WB)                | Rabbit         | A0207-100ul           | Abclonal                                |
| BCL-2                                                     | 1:2500(WB)                | Rabbit         | A0208-100ul           | Abclonal                                |
| AKT                                                       | 1:2500(WB)                | Rabbit         | 4691                  | CST                                     |
| phospho-AKT(Thr308)                                       | 1:2500(WB)                | Rabbit         | 4056                  | CST                                     |
| FAK                                                       | 1:2500(WB)                | Rabbit         | 3285                  | CST                                     |
| phospho-FAK(Tyr397)                                       | 1:2500(WB)                | Rabbit         | 3283                  | CST                                     |
| ERK1/2                                                    | 1:2500(WB)                | Mouse          | A10613                | Abclonal                                |
| phospho-<br>ERK1(T202/Y204) +<br>ERK2(T185/Y187)          | 1:2500(WB)                | Rabbit         | AP0472                | Abclonal                                |
| AMPK $\alpha$ 1/2                                         | 1:2500(WB)                | Mouse          | sc-74461              | Santa Cruz                              |
| phospho-AMPK $\alpha$<br>(Thr172)                         | 1:2500(WB)                | Rabbit         | 50081                 | CST                                     |
| OGG1/2                                                    | 1:2500(WB)                | Mouse          | sc-376935             | Santa Cruz                              |
| $\beta$ -actin                                            | 1:2500(WB)                | Rabbit         | AC026                 | Abclonal                                |
| FNDC5                                                     | 1:2500(WB)                | Rabbit         | ab174833              | Abcam                                   |
| TUJ1                                                      | 1:2500(WB)                | Rabbit         | G712A                 | Promega                                 |
| GFAP                                                      | 1:2500(WB)                | Rabbit         | A0237                 | Abclonal                                |
| OLIGO2                                                    | 1:2500(WB)                | Rabbit         | A12814                | Abclonal                                |
| IBA1                                                      | 1:2500(WB)                | Rabbit         | A1527                 | Abclonal                                |
| 6X His tag                                                | 1:2500(WB)                | Rabbit         | ab18184               | Abcam                                   |
| Alexa Fluor 488 Anti-6X<br>His tag                        | 1:1000(IF)                | Rabbit         | ab237336              | Abcam                                   |

Supplementary Information: full, uncropped main western blot

Figure 1 e

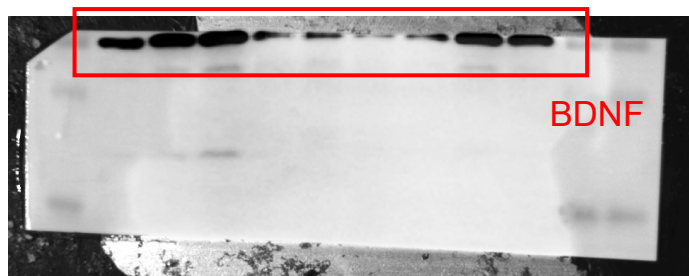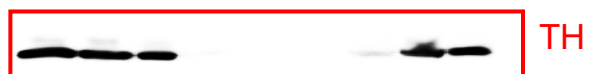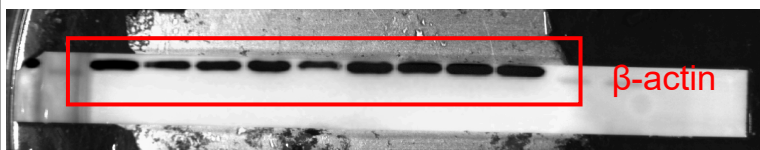

Figure 1 q

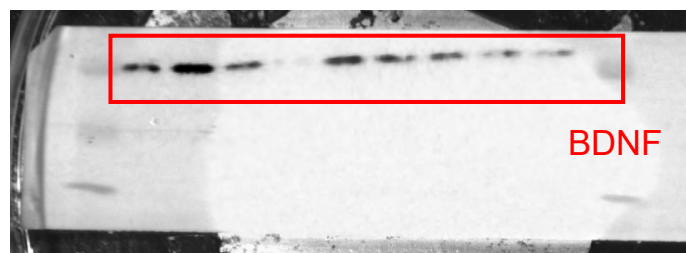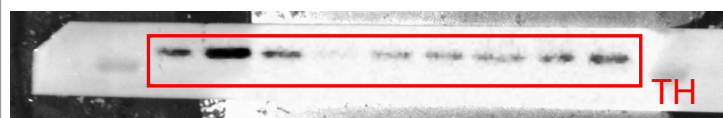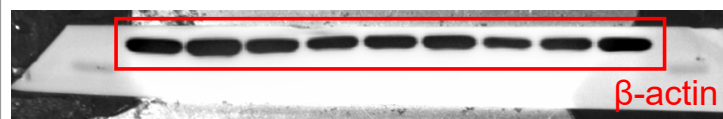

Figure 1 k

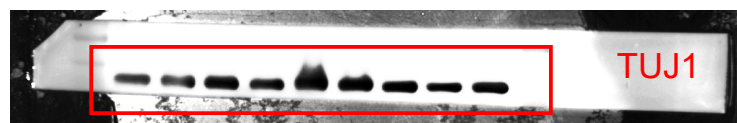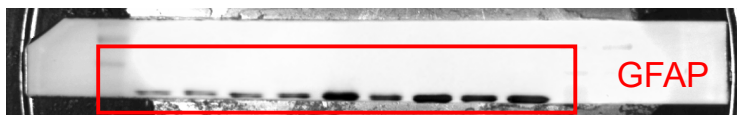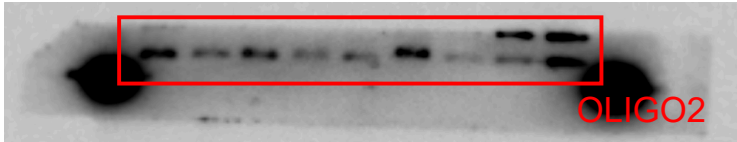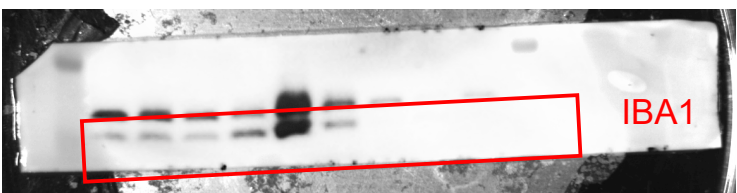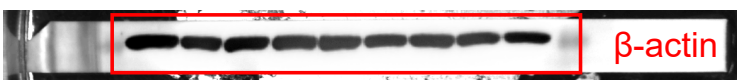

Figure 1 w

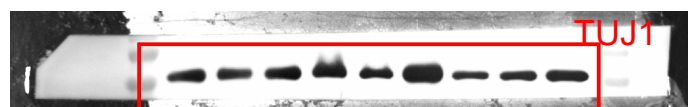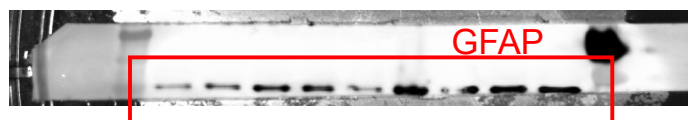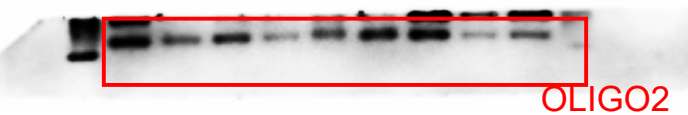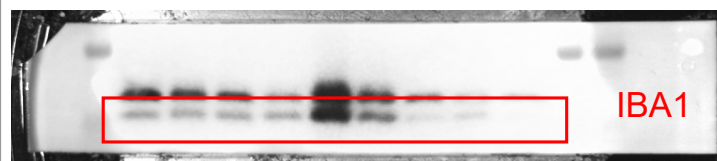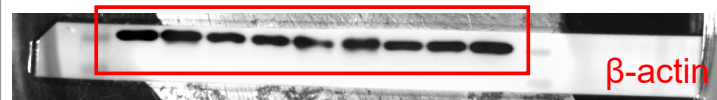

**Figure 2 a**

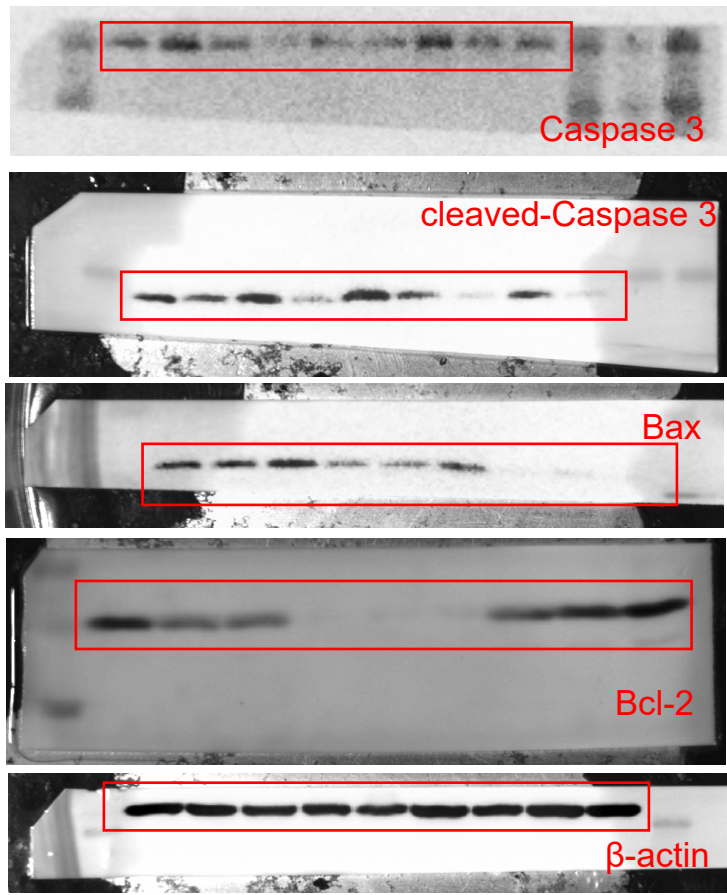

**Figure 2 c**

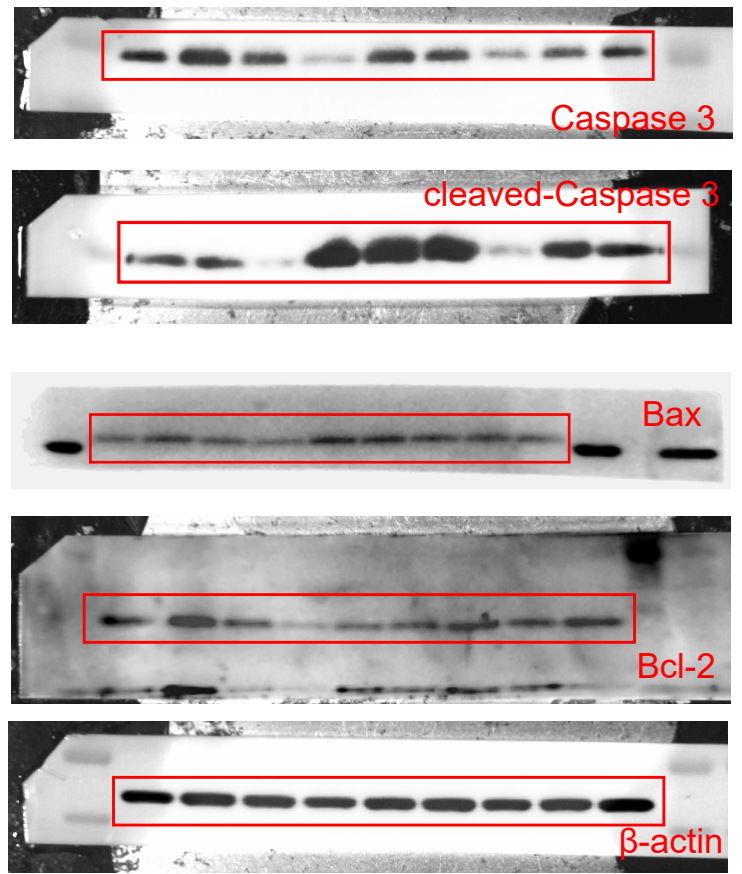

**Figure 2 i**

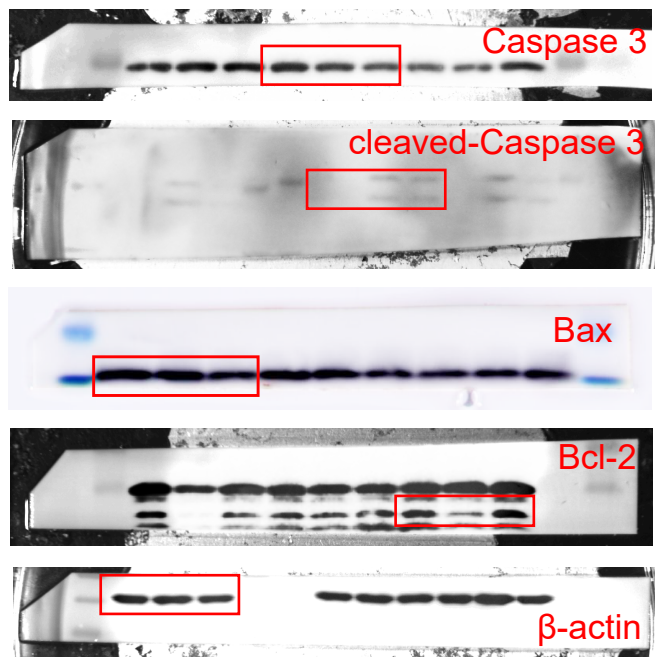

**Figure 2 k**

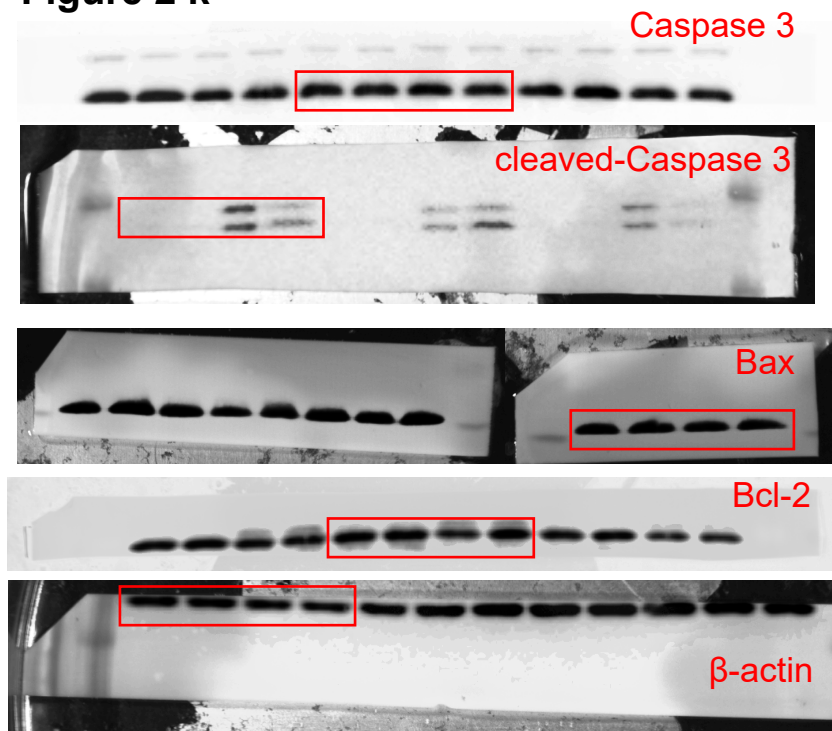

**Figure 3 g**

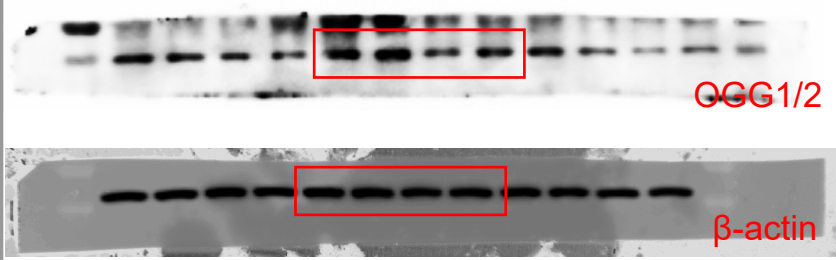

**Figure 3 i**

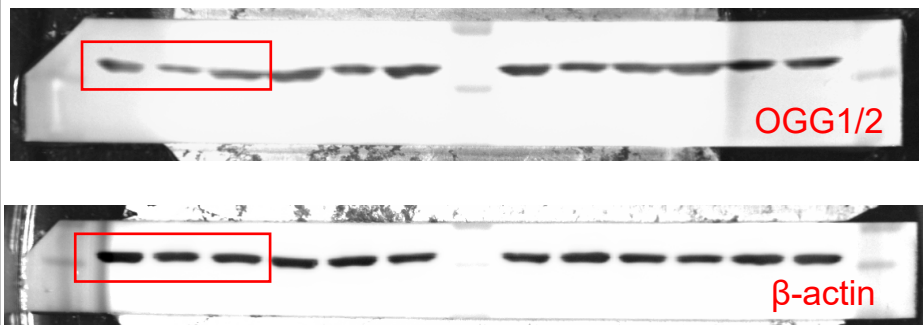



**Figure 4 g**

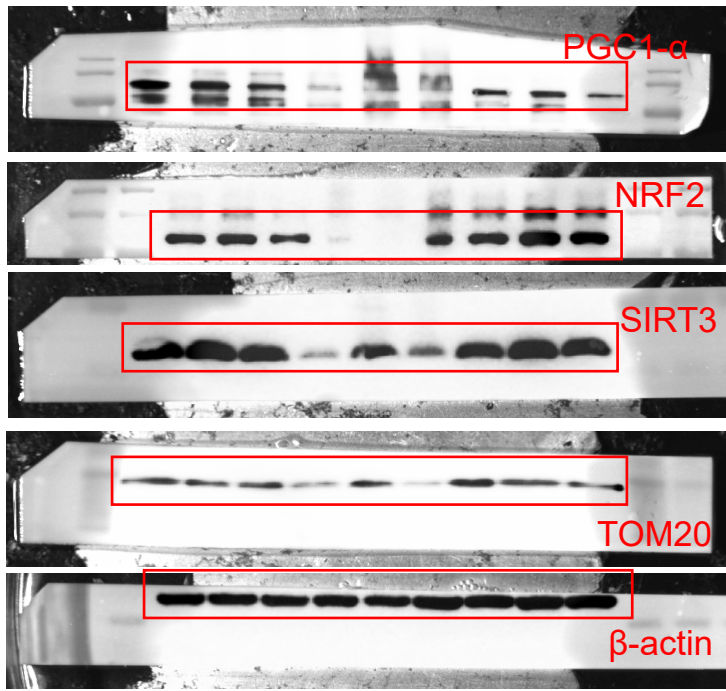

**Figure 4 i**

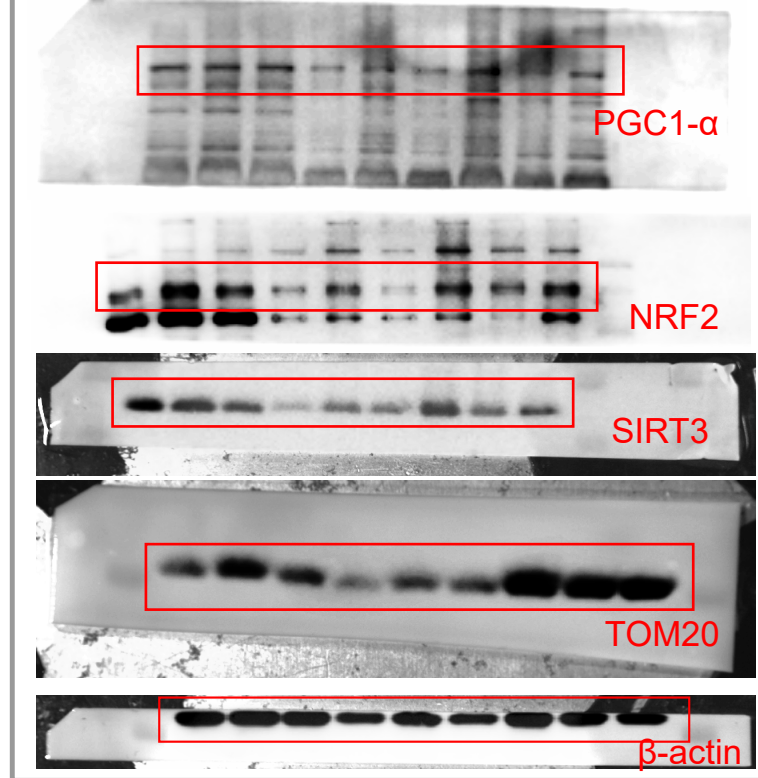

**Figure 4 n**

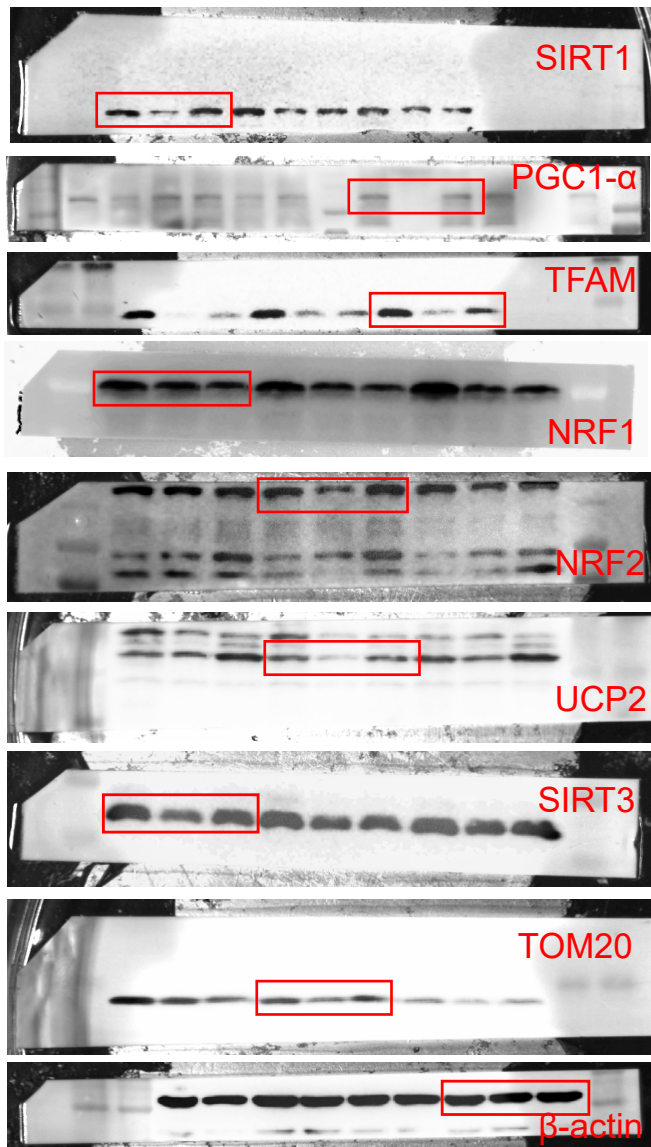

**Figure 4 p**

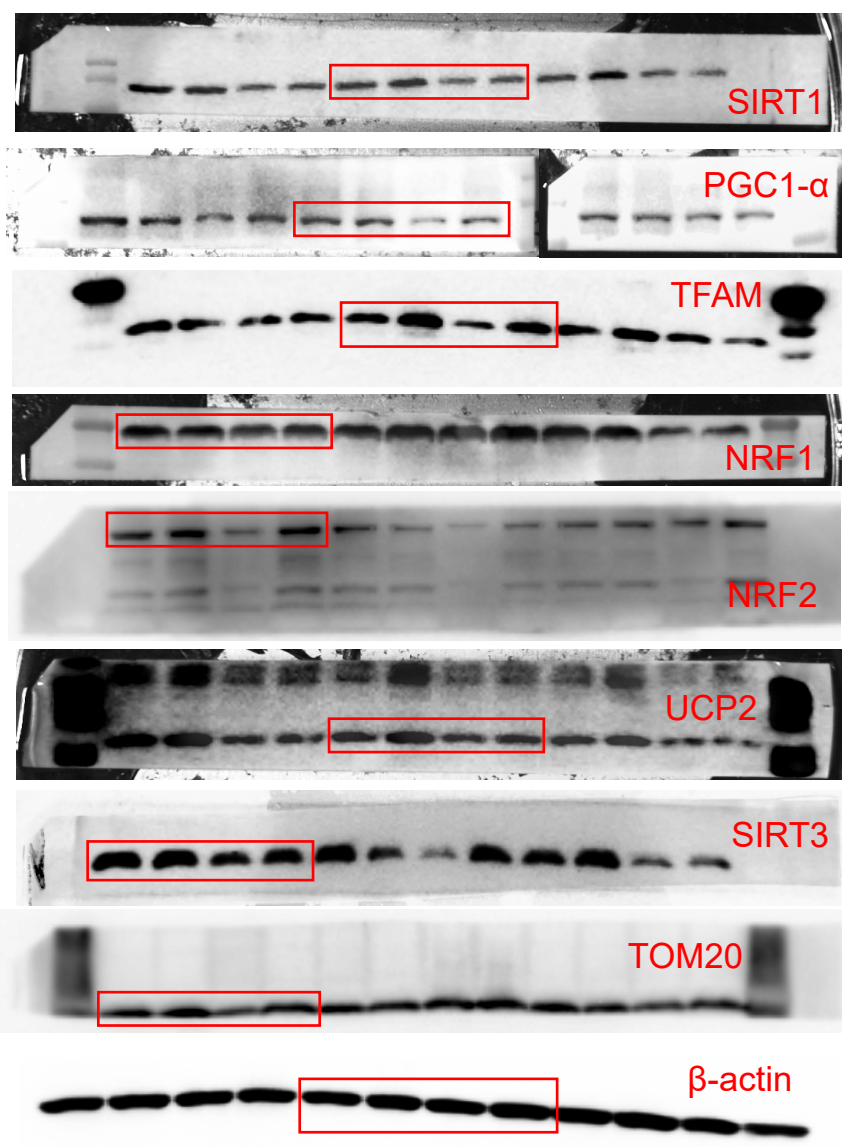

**Figure 5 a**

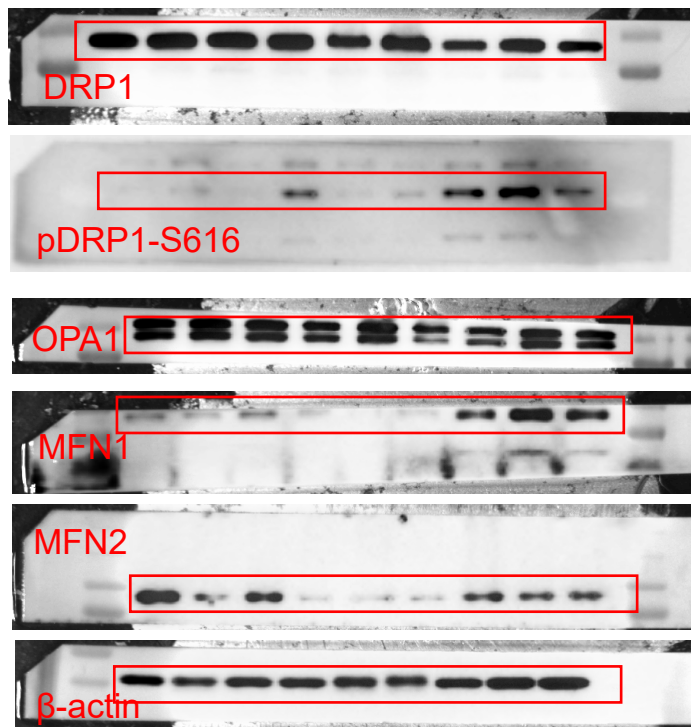

**Figure 5 c**

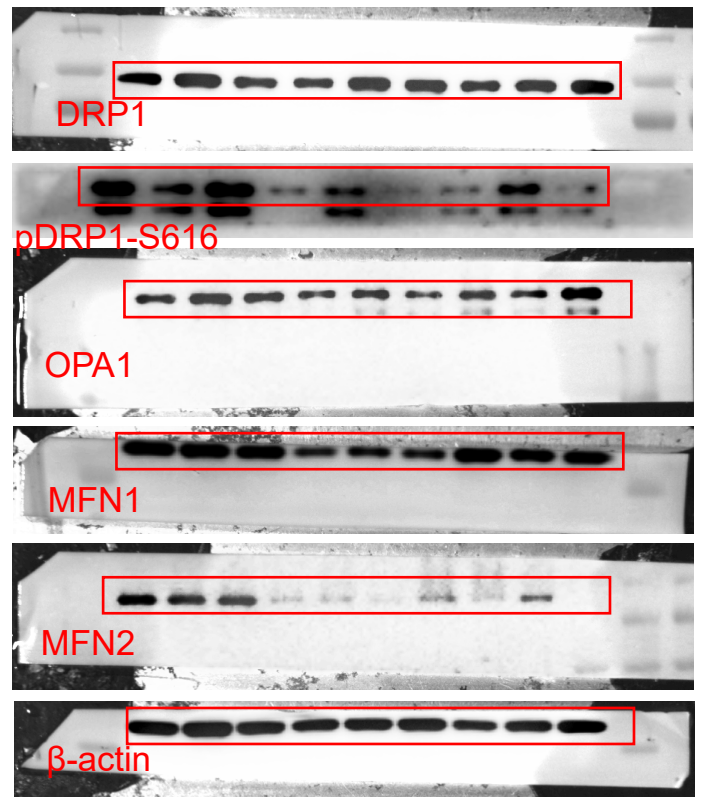

**Figure 5 k**

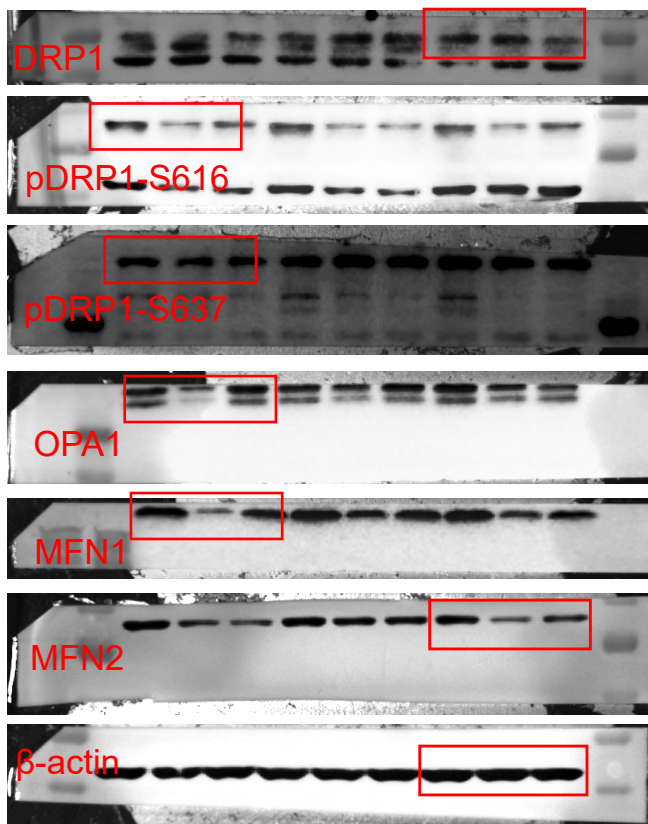

**Figure 5 m**

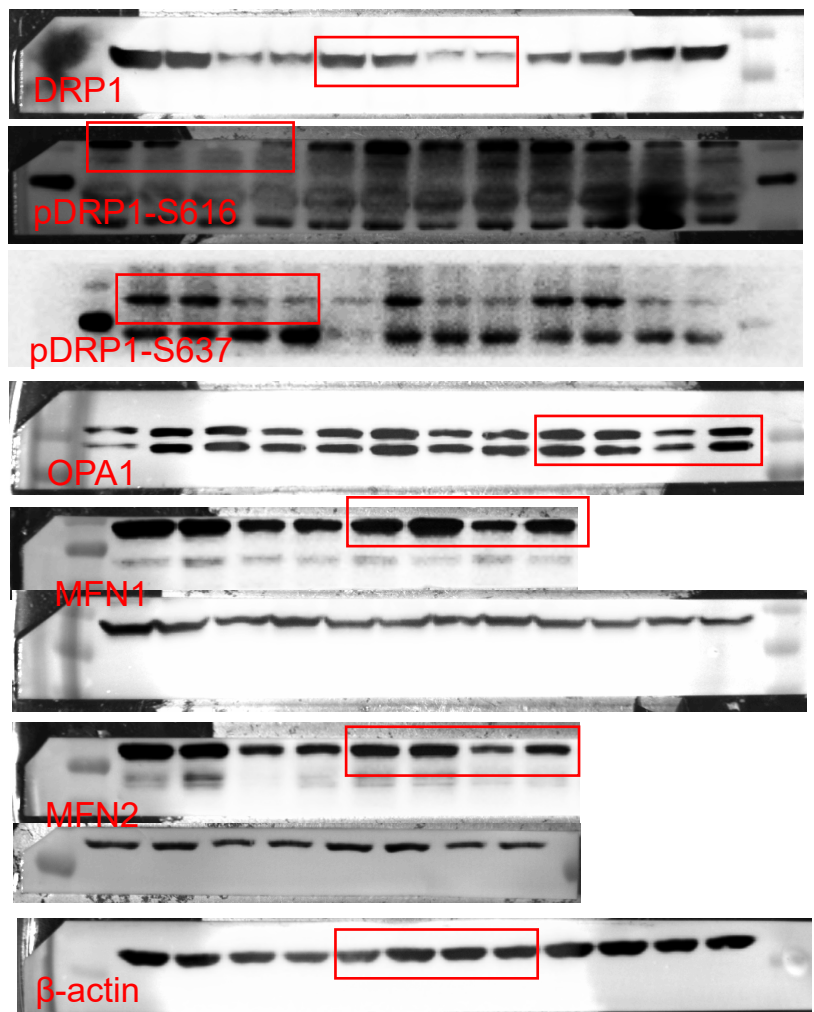

**Figure 6 a**

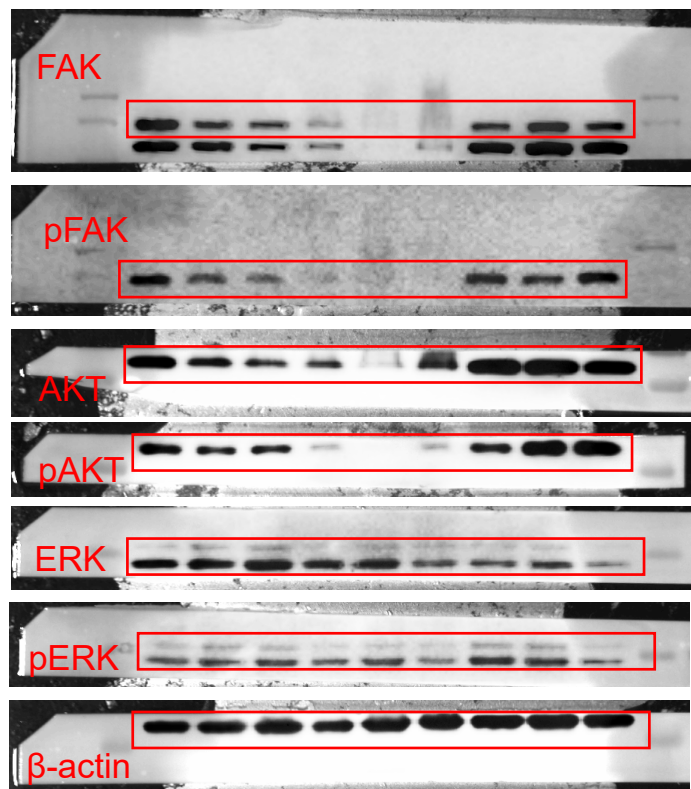

**Figure 6 c**

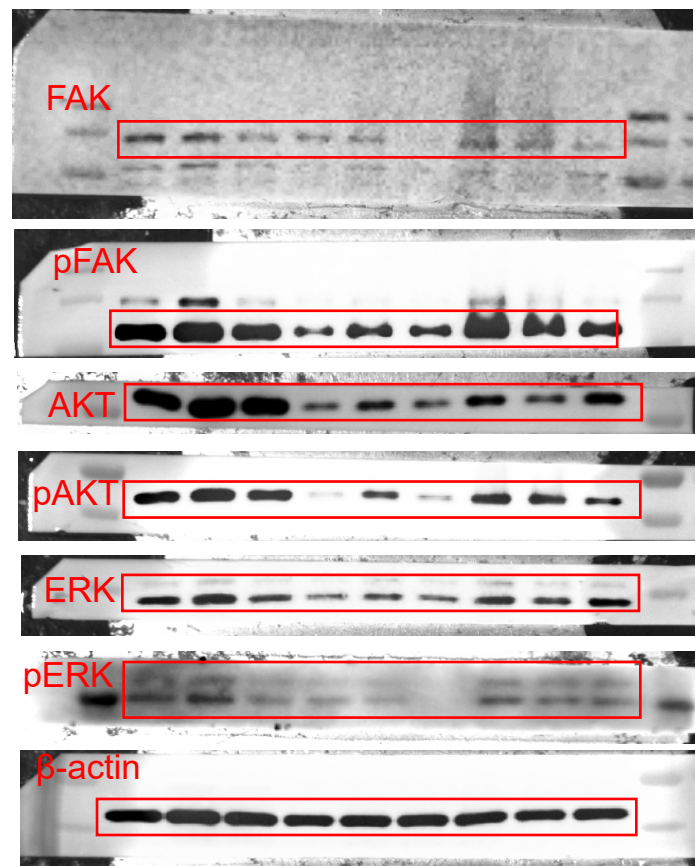

**Figure 6 e**

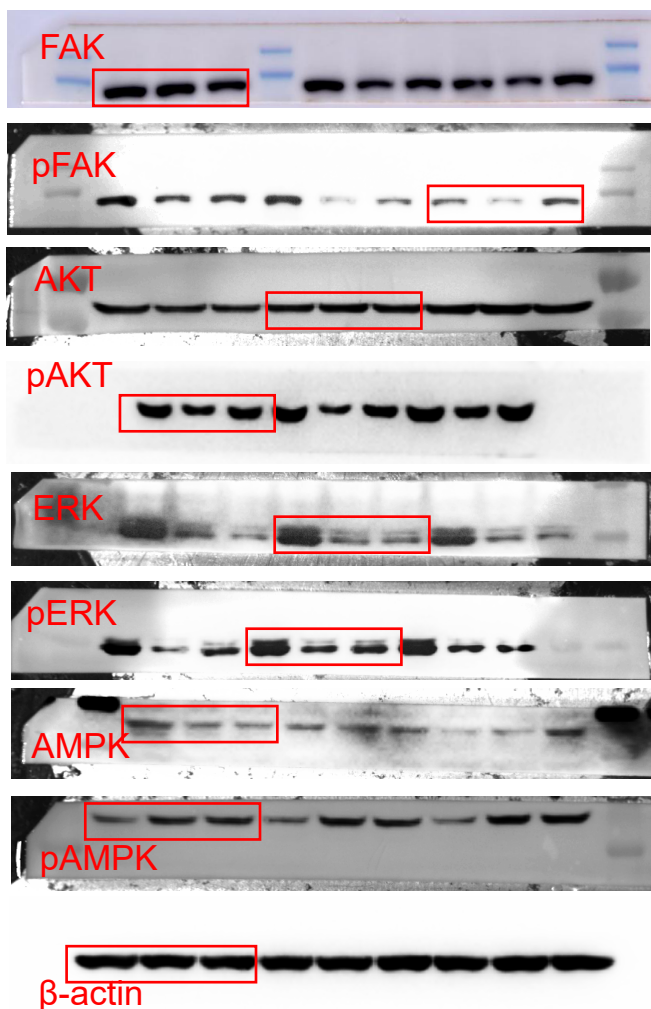

**Figure 6 g**

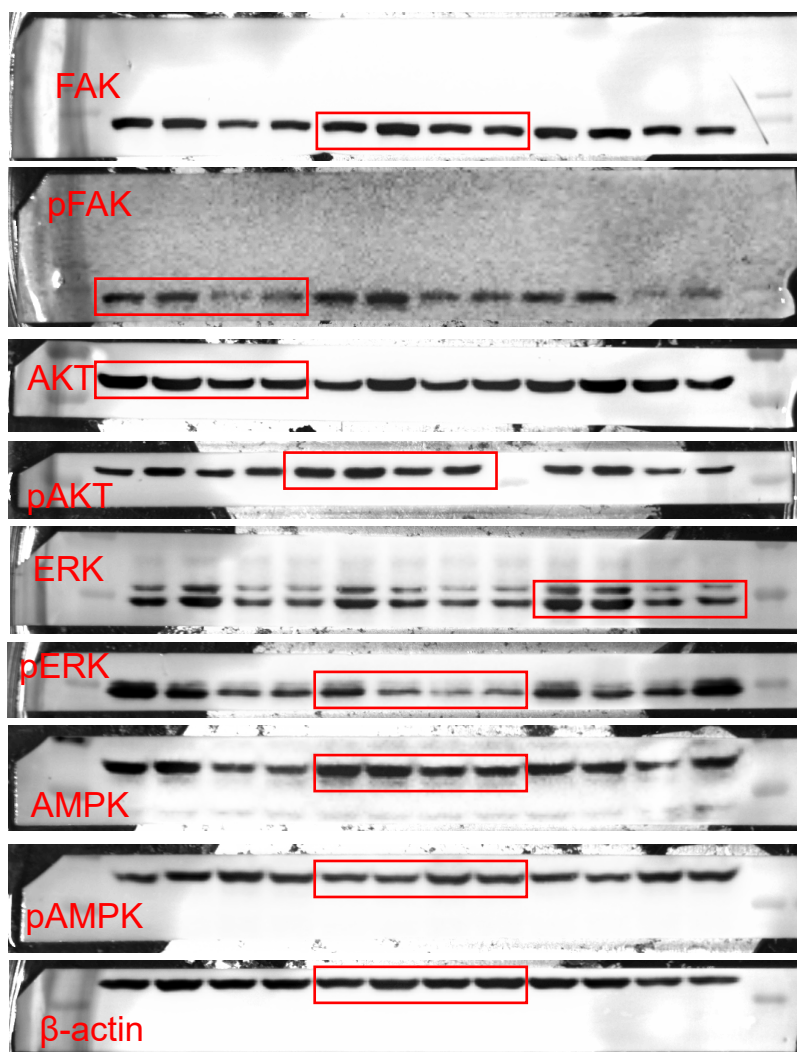

Figure 7 f

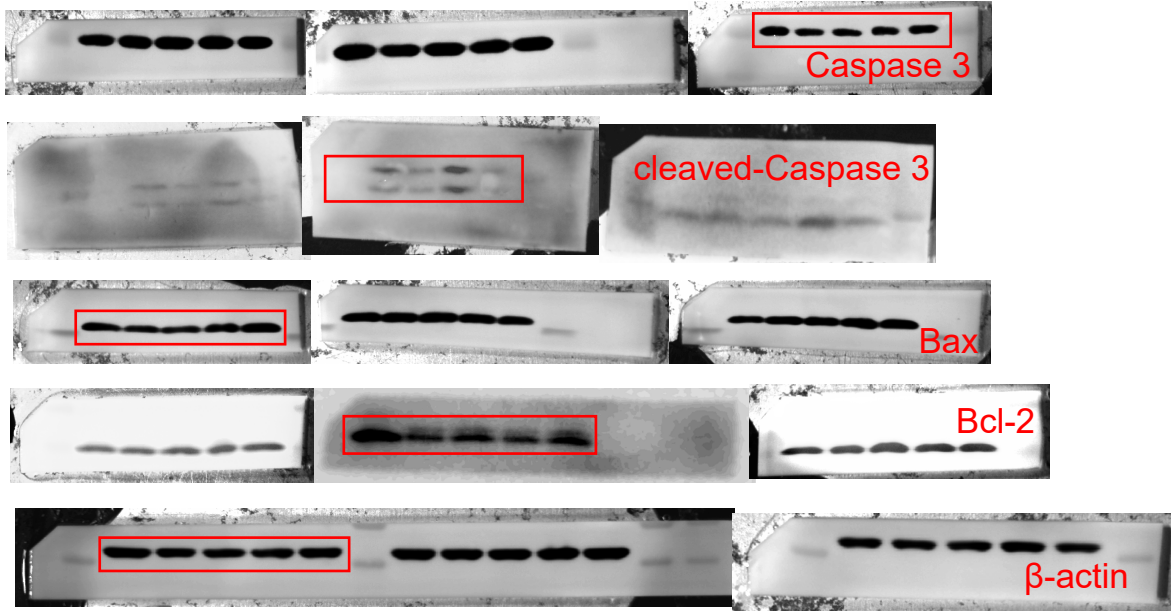

Figure 7 h

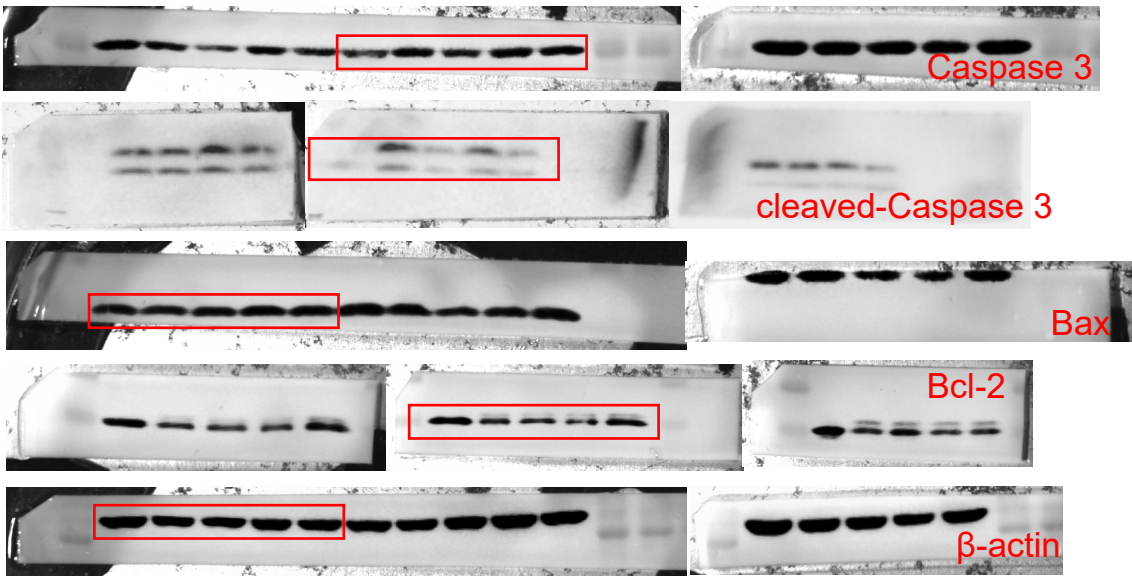

**Figure 8 e**

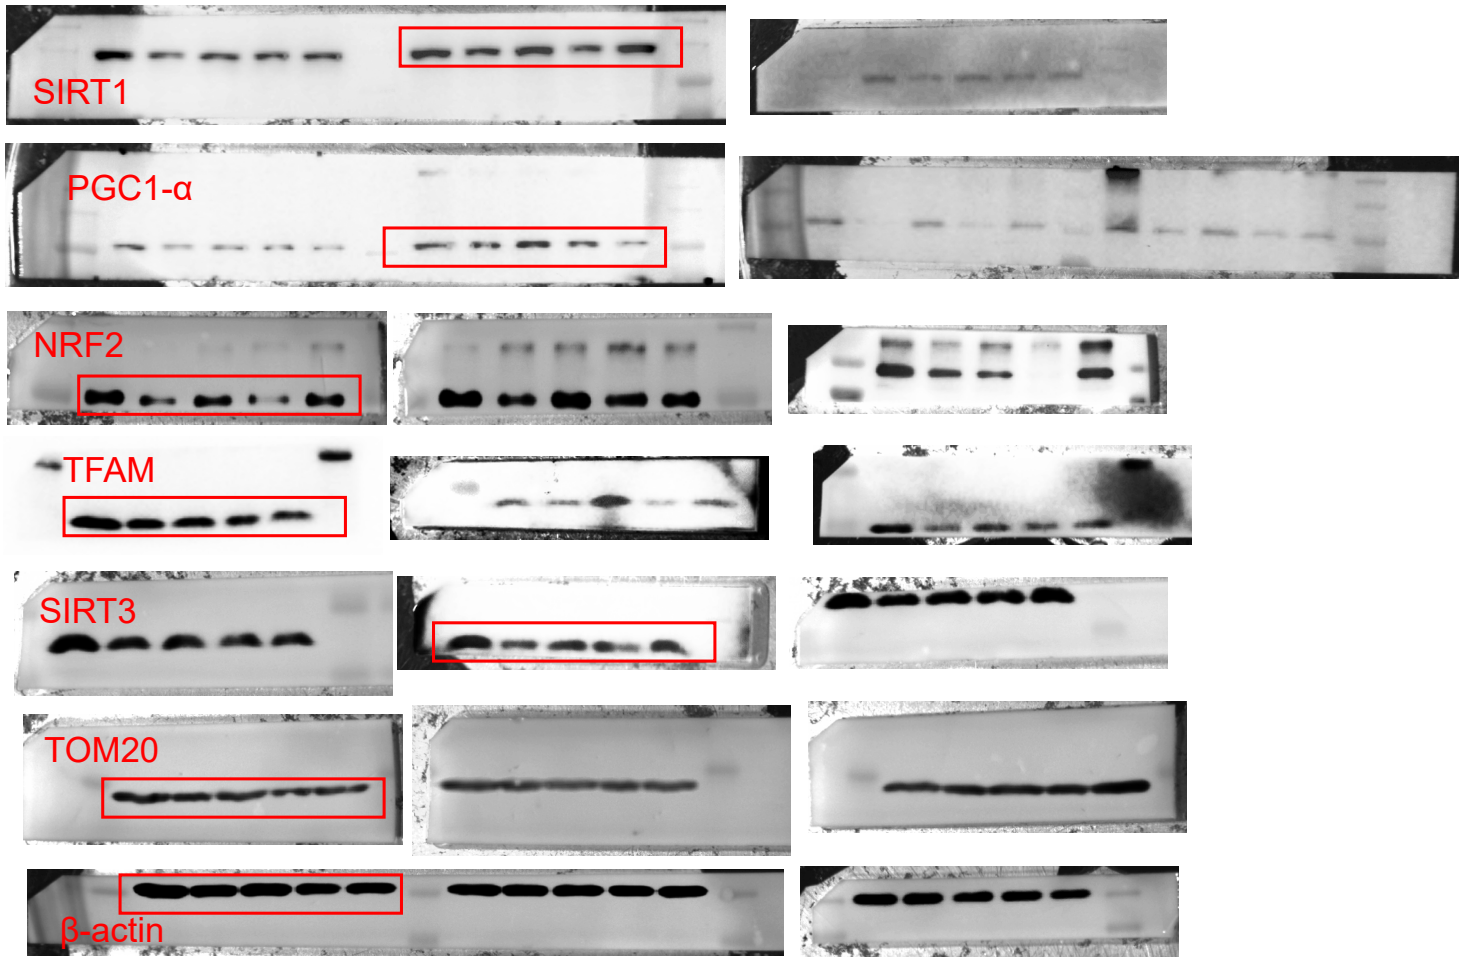

**Figure 8 g**

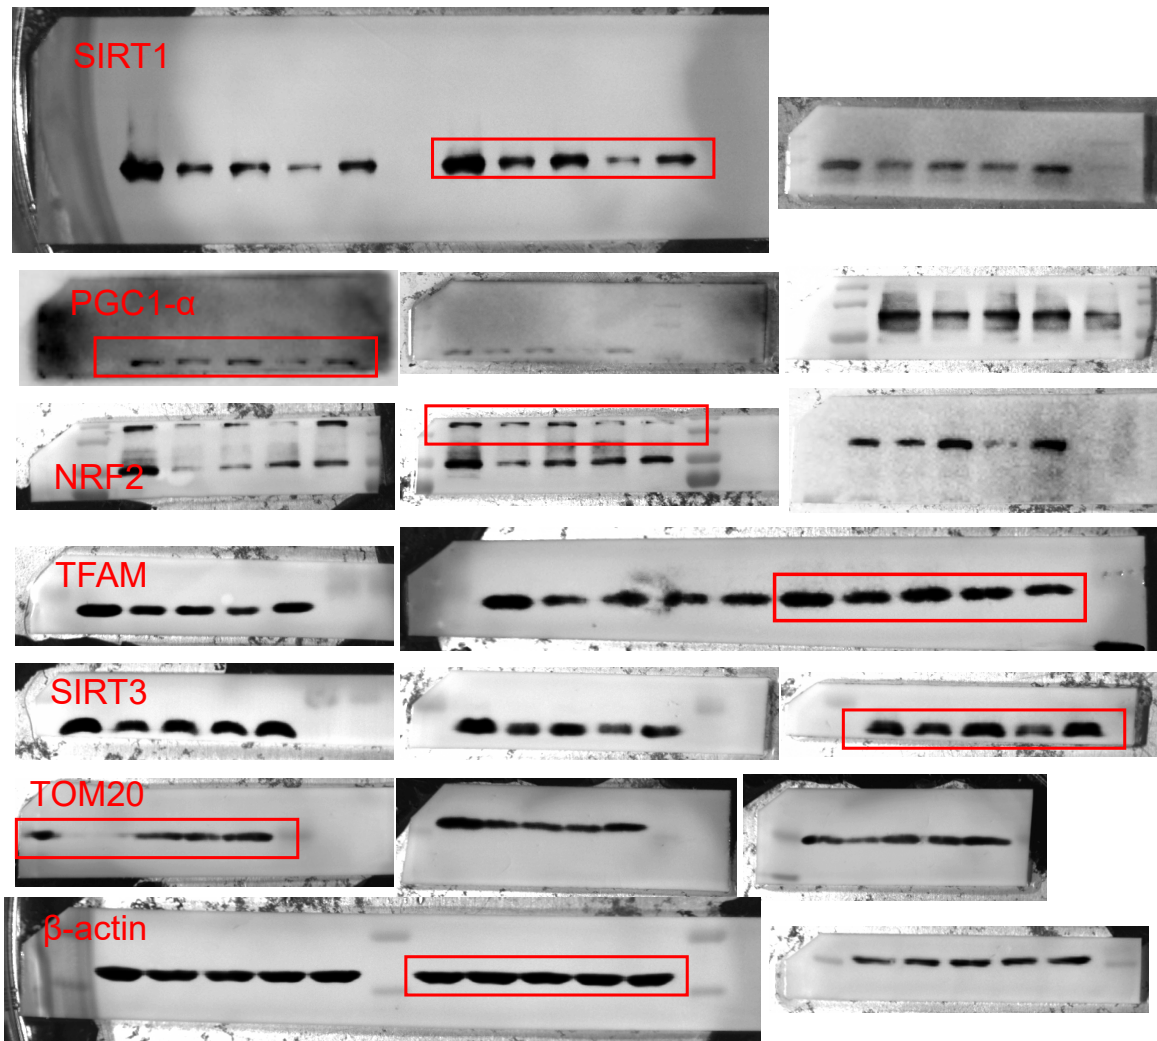

**Figure 9 e**

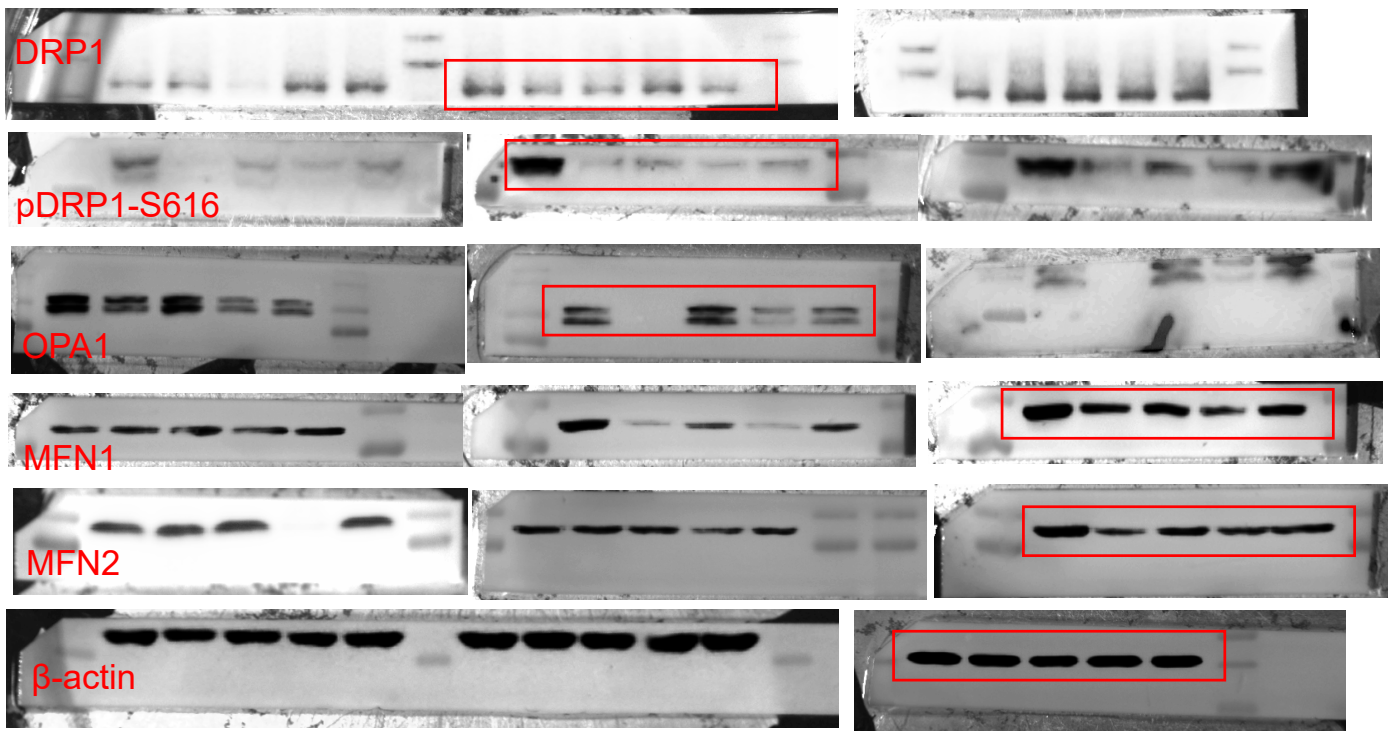

**Figure 9 g**

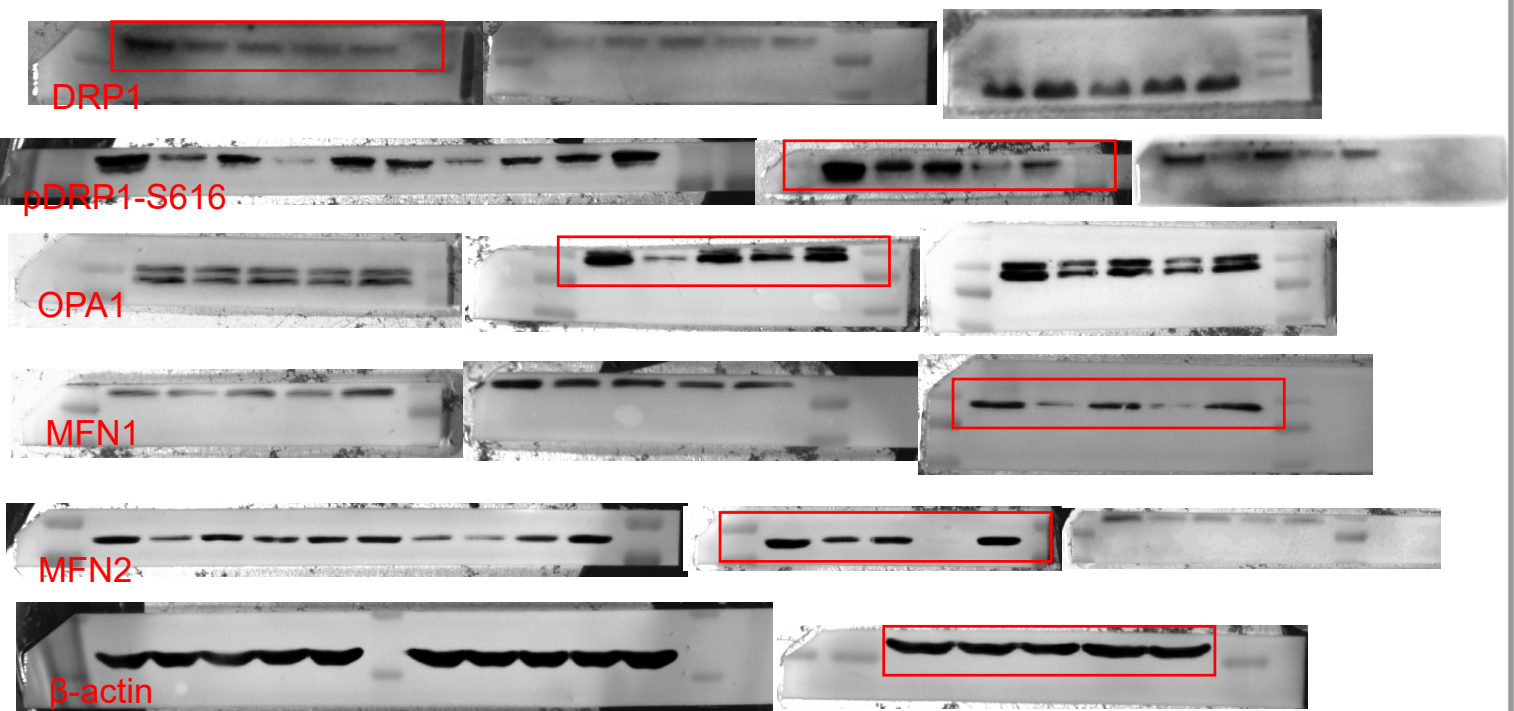

**Figure 10 c**

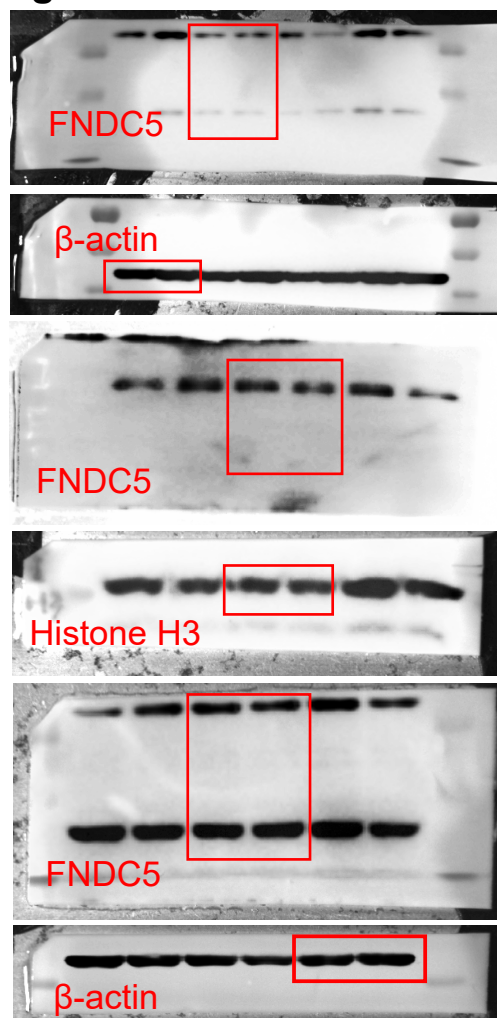

**Figure 10 d**

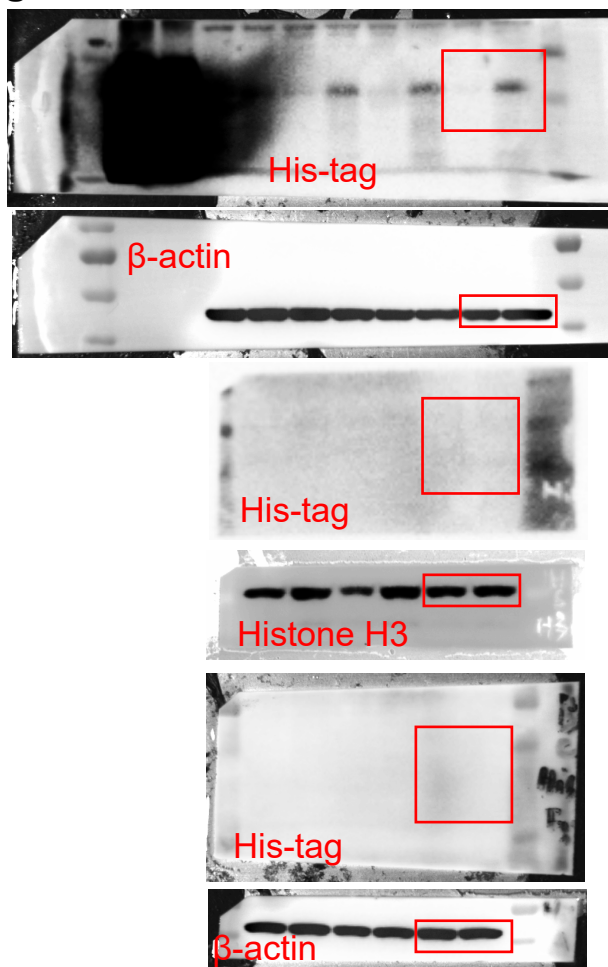

**Figure 10 g**

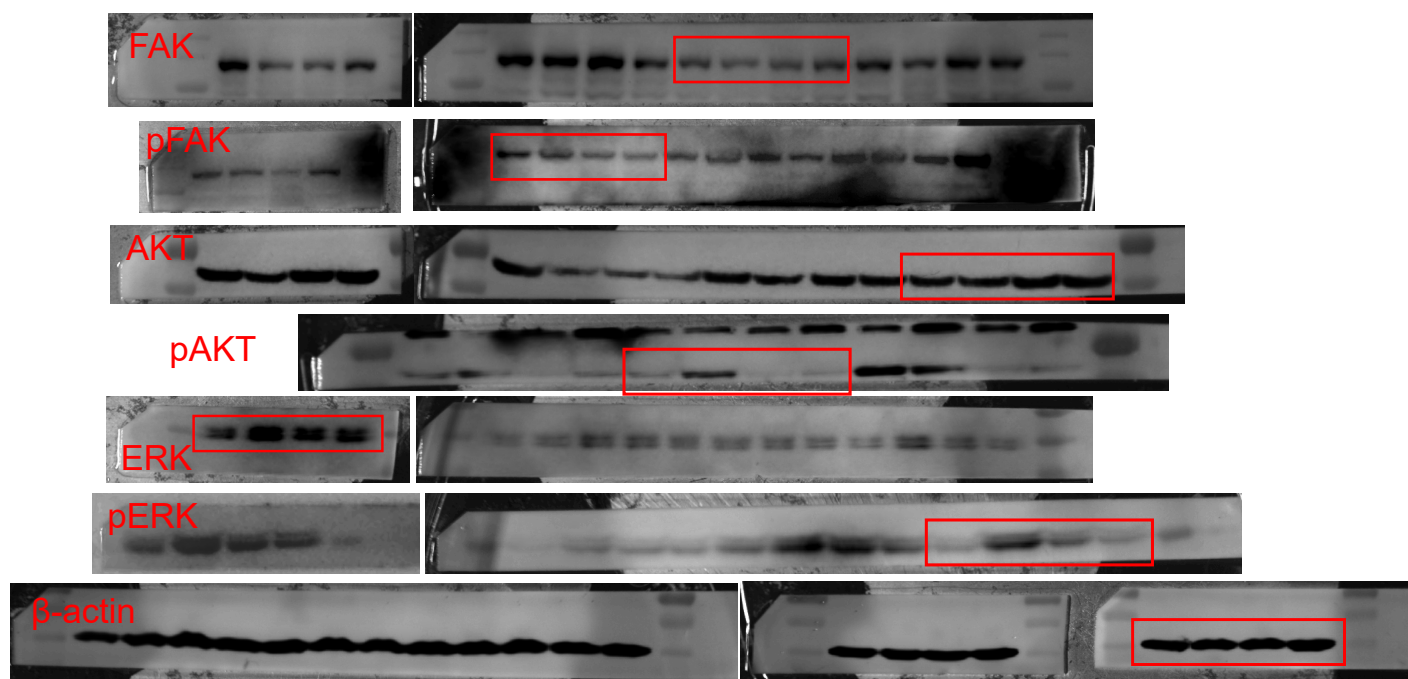

### Supplementary Figure 4 e

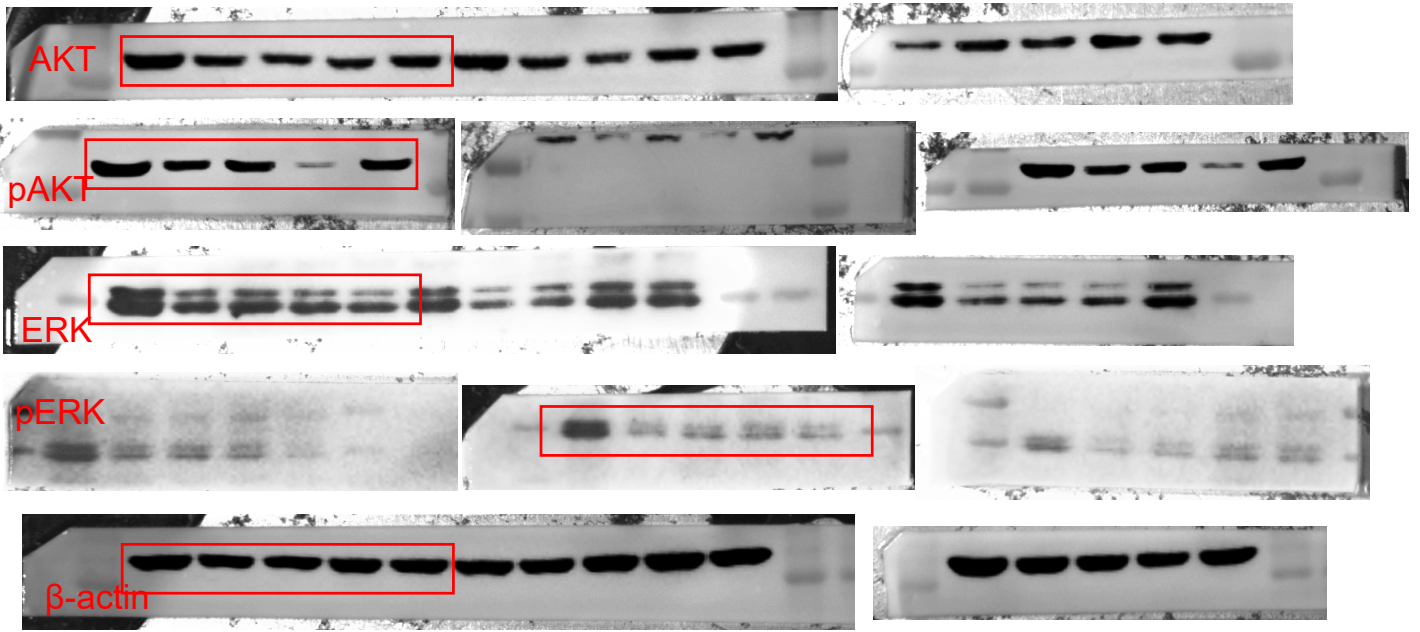

### Supplementary Figure 4 g

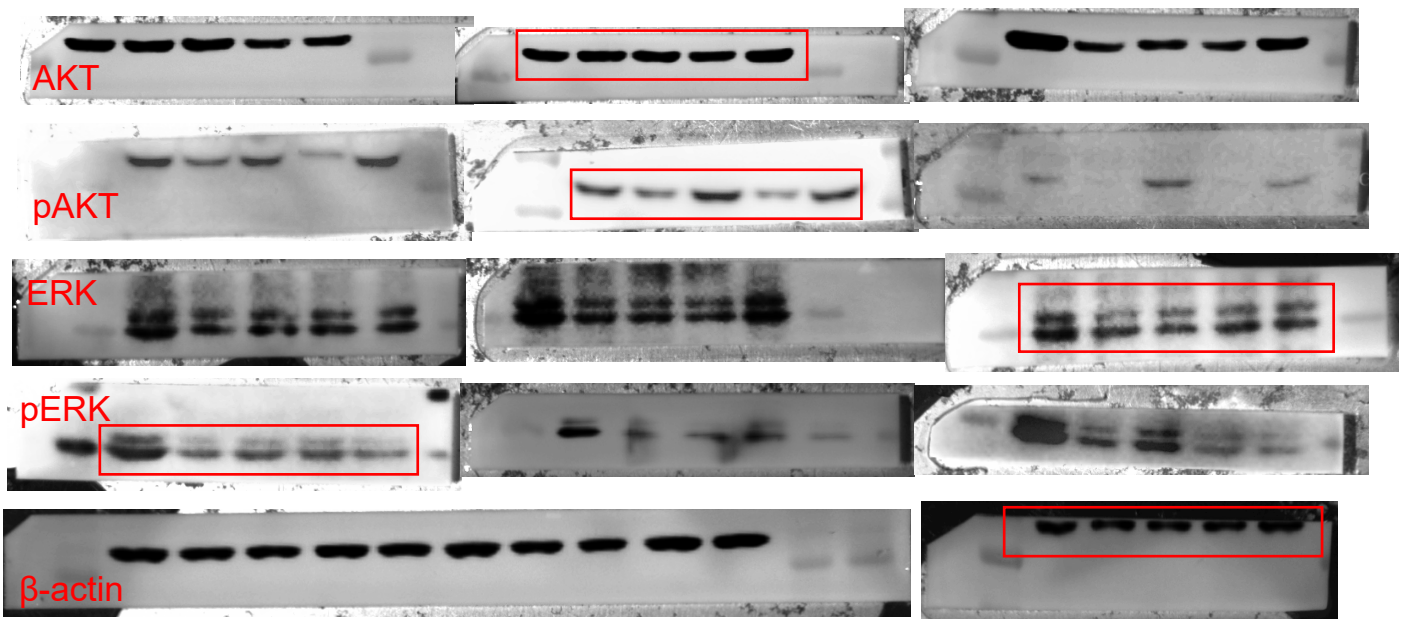

Supplement: 41531_2023_453_MOESM1_ESM.pdf [file 41531_2023_453_MOESM1_ESM.pdf]
